# Supplementary material
Source: PubMed Central journal article supplement (PMC8594903)
Supplement: NIHMS1007558-supplement-Appendix.pdf [file NIHMS1007558-supplement-Appendix.pdf]

### Appendix A: Locally defined criteria of a poor household

| Very Poor                                                                                                                                                                                                                                                                                                                                                                                                                                                                                                                                                                                                                                                                     | Poor                                                                                                                                                                                                                                                                                                                                                                                                                                                                                                                                                                                                                                                                                         | Less Poor                                                                                                                                                                                                                                                                                                                                                                                                                                                                                                        |
|-------------------------------------------------------------------------------------------------------------------------------------------------------------------------------------------------------------------------------------------------------------------------------------------------------------------------------------------------------------------------------------------------------------------------------------------------------------------------------------------------------------------------------------------------------------------------------------------------------------------------------------------------------------------------------|----------------------------------------------------------------------------------------------------------------------------------------------------------------------------------------------------------------------------------------------------------------------------------------------------------------------------------------------------------------------------------------------------------------------------------------------------------------------------------------------------------------------------------------------------------------------------------------------------------------------------------------------------------------------------------------------|------------------------------------------------------------------------------------------------------------------------------------------------------------------------------------------------------------------------------------------------------------------------------------------------------------------------------------------------------------------------------------------------------------------------------------------------------------------------------------------------------------------|
| <p>It is a person who does not have any possessions in his household;</p> <ul style="list-style-type: none"> <li>- Does not possess any animals;</li> <li>- Often does not have enough to eat, or skips meals;</li> <li>- Does not have money to provide for necessities;</li> <li>- Cannot take care of himself;</li> <li>- Does not possess savings or access to credit;</li> <li>- Has never been consulted in decision-making;</li> <li>- Is never able to resolve his difficulties;</li> <li>- Does not have healthy arms;</li> <li>- Does not have access to care;</li> <li>- Does not have cultivable land;</li> <li>- Is poorly lodged and poorly dressed.</li> </ul> | <p>-It is a person who does not have any possession in his household;</p> <ul style="list-style-type: none"> <li>-Possesses no more than a few animals in his household;</li> <li>-At certain times does not have enough to eat;</li> <li>-Consumes the grain stocks which are being saved for the upcoming season;</li> <li>-Does not possess any money to provide for necessities;</li> <li>-Cannot properly take care of himself;</li> <li>-Does not possess any savings;</li> <li>-Does not have access to credit;</li> <li>-Has never been consulted in decision-making;</li> <li>-Is never able to resolve his difficulties;</li> <li>-Is poorly lodged and poorly dressed.</li> </ul> | <p>-It is a person who has but a few possessions in his household;</p> <ul style="list-style-type: none"> <li>-Possesses no more than a few animals in his household;</li> <li>-Has enough to eat, but not the desired foods;</li> <li>-Can register some of his children in school;</li> <li>-Cannot have access to primary care;</li> <li>-Has cultivable lands;</li> <li>-Has healthy arms;</li> <li>-Is consulted in decision-making;</li> <li>-He is sometimes able to resolve his difficulties.</li> </ul> |
| <ul style="list-style-type: none"> <li>-It is a person who has neither shoes nor clothes;</li> <li>-Does not have anything to eat;</li> <li>-Does not have money;</li> <li>-Has frail health;</li> <li>-Is marginalized;</li> <li>-Does not have a bicycle;</li> <li>-A person who begs;</li> <li>-Is not able to give birth</li> </ul>                                                                                                                                                                                                                                                                                                                                       | <ul style="list-style-type: none"> <li>- It is a person who is better off than the very poor person;</li> <li>-The roof of his house is made of straw and is not practical;</li> <li>-Who survives;</li> <li>-Does not own any cows, but might have birds;</li> <li>-Who has a hard time having a bicycle.</li> </ul>                                                                                                                                                                                                                                                                                                                                                                        | <ul style="list-style-type: none"> <li>-It is a person who can resolve his own problems but not those of others;</li> <li>-Has healthy skin;</li> <li>-Has a good house;</li> <li>-Eats when he is hungry;</li> <li>-Is properly dressed;</li> <li>-Is able to send his children to school;</li> <li>-Is able to own cows.</li> </ul>                                                                                                                                                                            |
| <ul style="list-style-type: none"> <li>-It is a person who does not have a house to sleep in;</li> <li>-Does not have anything to eat;</li> <li>-Makes a recourse to others to meet his needs;</li> <li>-Does not have any chickens;</li> <li>-Is not able to send his children to school.</li> </ul>                                                                                                                                                                                                                                                                                                                                                                         | <ul style="list-style-type: none"> <li>-It is a person who does not eat whenever he is hungry;</li> <li>-Does not eat every day;</li> <li>-Has an uncertain environment;</li> <li>-Can partially school his children;</li> <li>-Does not have money to suitably provide for his needs.</li> </ul>                                                                                                                                                                                                                                                                                                                                                                                            | <ul style="list-style-type: none"> <li>-It is a person who is able to have food to eat;</li> <li>-Is able to take care of himself;</li> <li>-Is able to send his children to school;</li> <li>-Is able to have a house to sleep in;</li> <li>-Is able to buy a bicycle;</li> <li>-Is able to own poultry;</li> <li>-Is better than the other two categories.</li> </ul>                                                                                                                                          |
| <ul style="list-style-type: none"> <li>-It is a person who cannot eat whenever he is hungry, nor is able to address his basic needs (caring for himself, paying for schooling or clothing)</li> <li>-Does not own small ruminant animals</li> <li>-No means of travel</li> </ul>                                                                                                                                                                                                                                                                                                                                                                                              | <ul style="list-style-type: none"> <li>-It is a person who has only 1-2 meals per day;</li> <li>-Does not possess large ruminant animals;</li> <li>-Does not have farming tools</li> <li>-Does not have workhands (a/k/a persons who can help with the work)</li> </ul>                                                                                                                                                                                                                                                                                                                                                                                                                      | <ul style="list-style-type: none"> <li>- It is a person who can eat when he is hungry (3 meals per day);</li> <li>-Can address his primary needs;</li> <li>-Possesses livestock (large and small ruminant animals);</li> <li>-Possesses a means of travel</li> </ul>                                                                                                                                                                                                                                             |
